# Supplementary material for: Three-dimensional honeycomb-like hierarchically structured carbon for high-performance supercapacitors derived from high-ash-content sewage sludge
Source: Royal Society of Chemistry journal article supplement (doi:10.1039/c5ta03217b), 2015-01-01
Supplement: c5ta03217b1.pdf [file c5ta03217b1.pdf]

## Electronic Supplementary Information

### **Three-dimensional honeycomb-like hierarchical structured carbon for High-performance supercapacitors derived from high-ash-content sewage sludge**

Haobin Feng,<sup>a</sup> Mingtao Zheng,<sup>\*a,b</sup> Hanwu Dong,<sup>a</sup> Yong Xiao,<sup>b</sup> Hang Hu,<sup>a</sup> Zhongxin Sun,<sup>a</sup> Chao Long,<sup>a</sup> Yijin Cai,<sup>a</sup> Xiao Zhao,<sup>a</sup> Haoran Zhang,<sup>b</sup> Bingfu Lei<sup>a,b</sup> and Yingliang Liu<sup>\*a,b</sup>

---

<sup>a</sup> Department of Materials Science and Engineering, College of Materials and Energy, South China Agricultural University, Guangzhou 510642, china. E-mail: [mtzheng@scau.edu.cn](mailto:mtzheng@scau.edu.cn) (M. Zheng), [tliuyl@scau.edu.cn](mailto:tliuyl@scau.edu.cn) (Y. Liu); Tel/Fax: +86 20 8528 0319.

<sup>b</sup> Guangdong Provincial Engineering Technology Research Center for Optical Agriculture, Guangzhou 510642, China.

**Table S1** Proximate and ultimate analyses of sewage sludge (SS) and HSC-3

| Content<br>(wt. %) | Moisture | Ash   | Volatil<br>e<br>matter | Fixed<br>carbon | C     | H    | N    | O     | Si    |
|--------------------|----------|-------|------------------------|-----------------|-------|------|------|-------|-------|
| SS                 | 2.39     | 69.33 | 27.30                  | 0.98            | 11.59 | 2.52 | 1.96 | 12.21 | 24.48 |
| FSC                | 0.00     | 9.24  | 21.02                  | 66.74           | 50.61 | 2.01 | 1.52 | 28.62 | 0.24  |
| HSC-3              | 0.00     | 0.32  | 12.22                  | 87.46           | 84.61 | 1.71 | 1.39 | 11.97 | 0.00  |

The proximate analysis was conducted according to ASTM E1755-01, ASTM E871-82 and ASTM E872-82 standards. For moisture determination, 1.0 g sample was taken in a crucible and placed in a muffle furnace at 105 °C for 2 h. The loss in weigh after drying was given as the moisture. In the same way, the conditions for ash and volatile matter determination were 575±10 °C for 4 h and 950±10 °C for 7 min, respectively. After each analysis, the crucible was removed from the furnace and placed in the desiccator until room temperature and weighed. Fixed carbon was calculated from: 100 % - moisture % - ash % - volatile matter %. Common organic elements such as C, H and N present in samples were determined through an EA2400 II elemental analyzer. The content of O was calculated from: 100 % - ash % - C % - H % - N %. The content of Si was measured by X-ray fluorescence (JSX-3400R, JEOL).

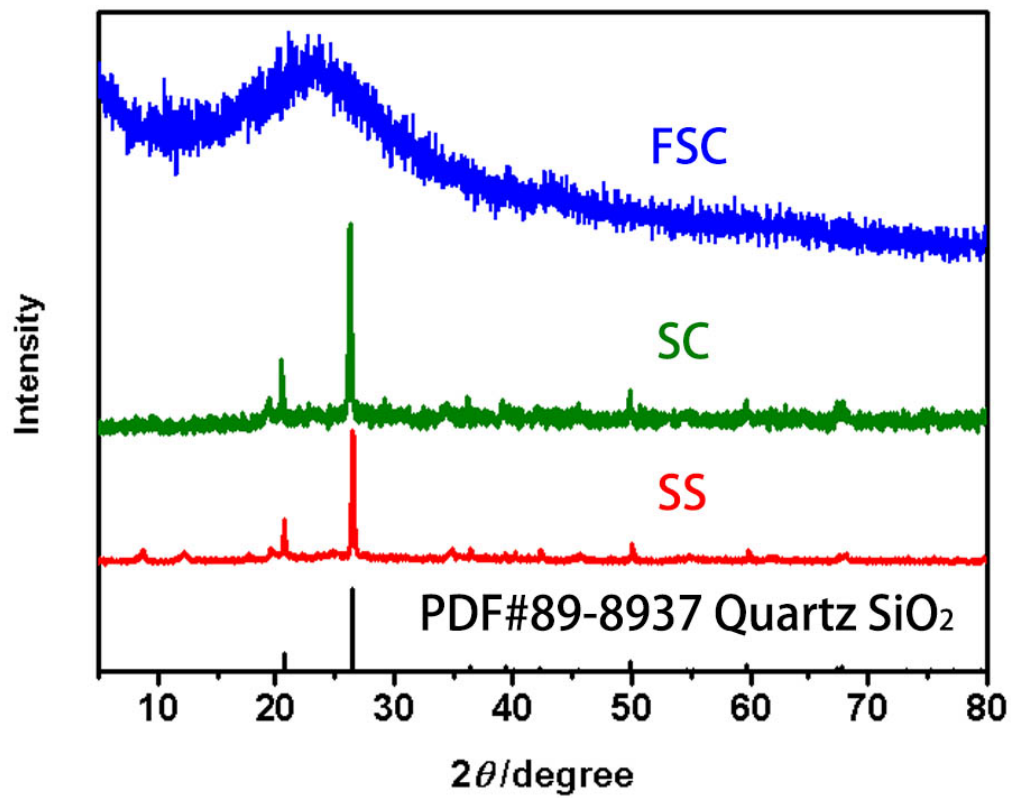

**Fig. S1** XRD pattern of SS, SC and FSC.

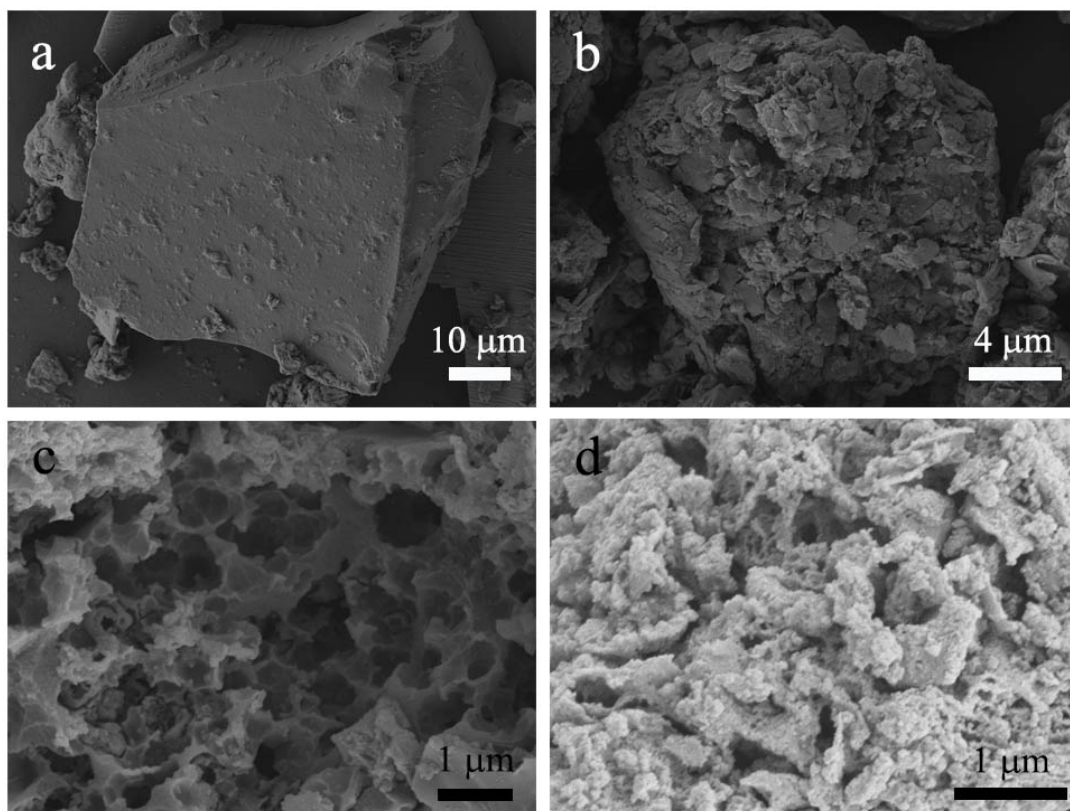

**Fig. S2** FESEM images of SS (a), SC (b), FSC (c), and ASC (d).

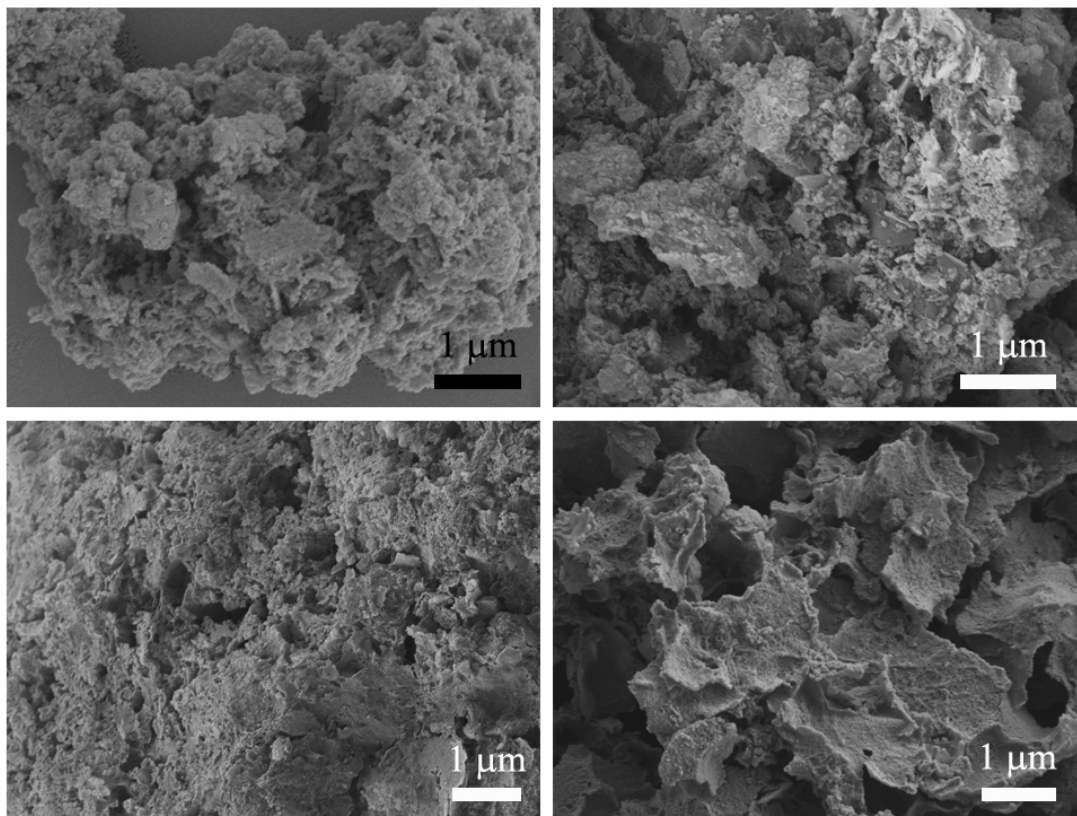

**Fig. S3** SEM image of the as-resulted ASC samples from different pre-treatment process (similar to fly-silicon) of SC before KOH activation: (a) hydrochloric acid, (b) nitric acid, (c) sulfuric acid, and (d) KOH.

**Table S2** Pore characteristics of SC, FSC, ASC, and HSC samples

| Sample | $S_{\text{BET}}^{\text{a}}$ [ $\text{m}^2 \text{g}^{-1}$ ] | $S_{\text{micro}}^{\text{b}}$ [ $\text{m}^2 \text{g}^{-1}$ ] | $V_{\text{pore}}^{\text{c}}$ [ $\text{cm}^3 \text{g}^{-1}$ ] | $V_{\text{micro}}^{\text{d}}$ [ $\text{cm}^3 \text{g}^{-1}$ ] | $D_{\text{aver}}^{\text{e}}$ [nm] |
|--------|------------------------------------------------------------|--------------------------------------------------------------|--------------------------------------------------------------|---------------------------------------------------------------|-----------------------------------|
| SC     | 31                                                         | 0                                                            | 0.008                                                        | 0                                                             | 110.44                            |
| FSC    | 111                                                        | 24                                                           | 0.269                                                        | 0.016                                                         | 9.67                              |
| ASC    | 1272                                                       | 788                                                          | 0.903                                                        | 0.406                                                         | 2.93                              |
| HSC-1  | 550                                                        | 382                                                          | 0.509                                                        | 0.189                                                         | 3.81                              |
| HSC-2  | 2125                                                       | 1306                                                         | 1.827                                                        | 0.647                                                         | 3.53                              |
| HSC-3  | 2839                                                       | 1218                                                         | 2.652                                                        | 0.681                                                         | 3.73                              |
| HSC-4  | 1001                                                       | 406                                                          | 1.308                                                        | 0.213                                                         | 5.16                              |

a BET surface area.

b Surface area of micropores, NLDFT method.

c Volume of pores at  $p/p^0 = 0.98$ .

d Volume of micropores, NLDFT method.

e Average pore diameter,  $4V/A$  by BET.

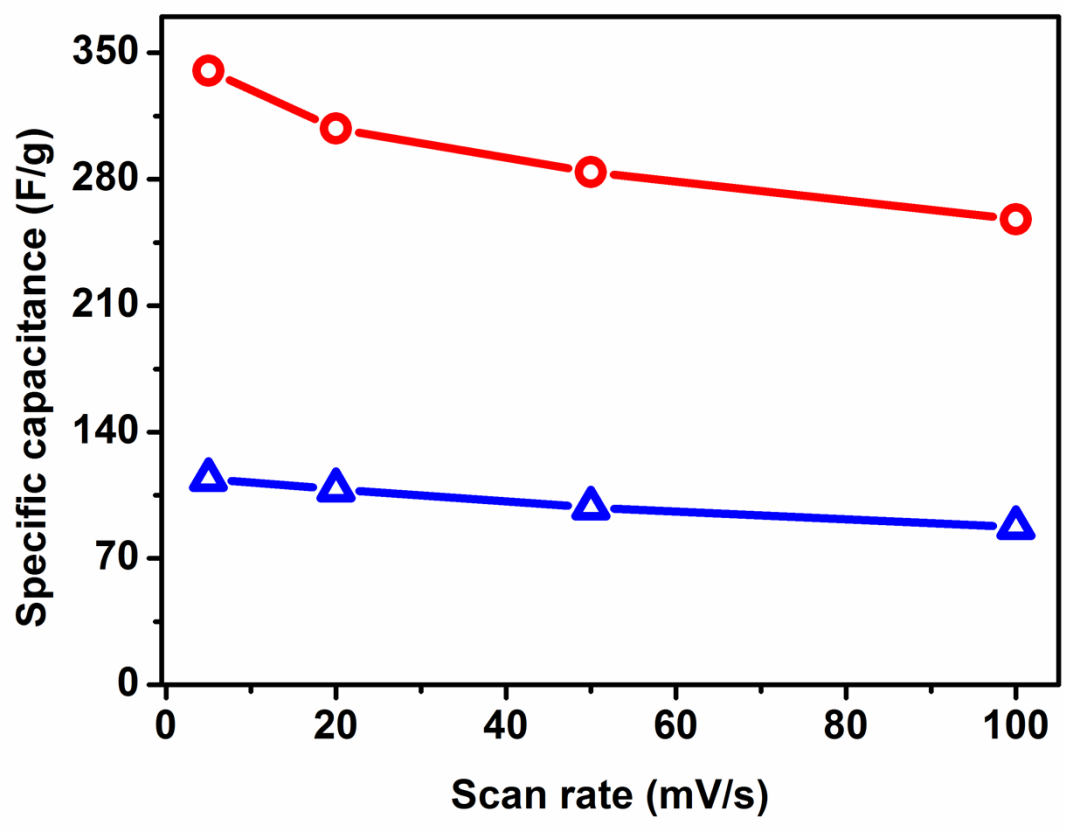

Fig. S4 Specific capacitance of HSC-3 and ASC at different scan rate.

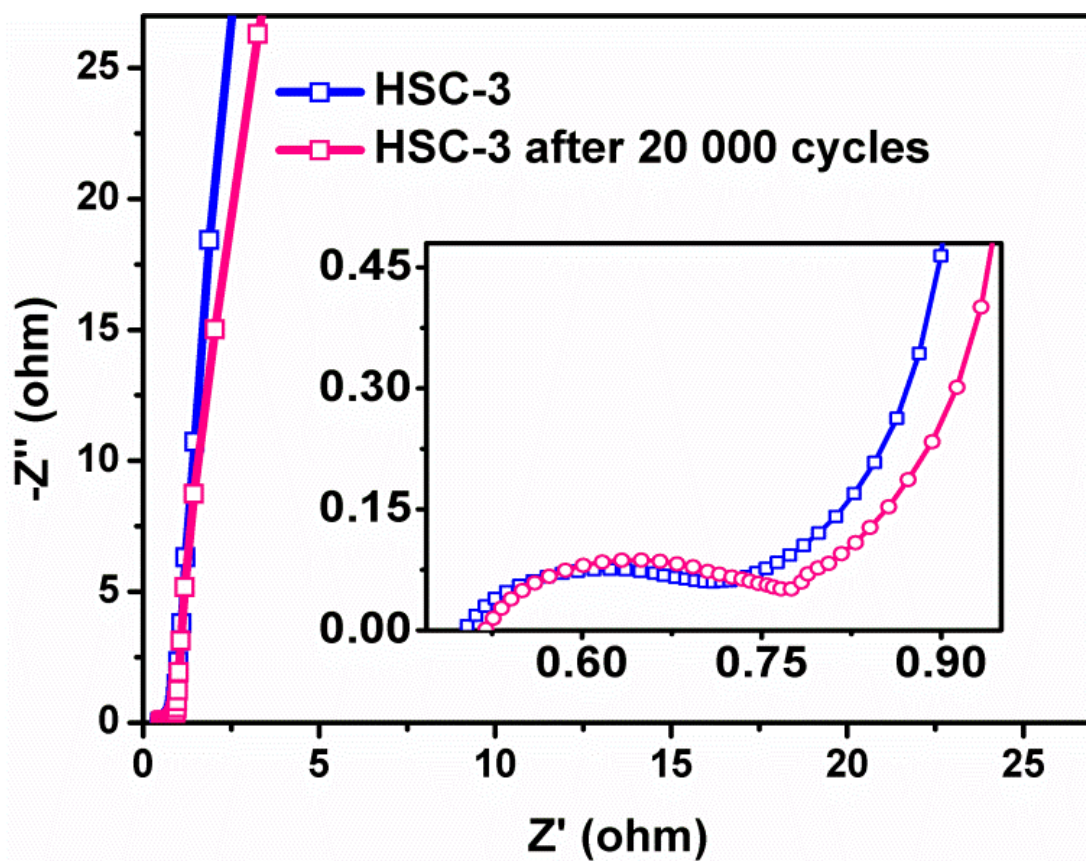

Fig. S5 Nyquist plots of HSC-3 electrode before and after 20 000 cycles.



**Table S3** Comparison of the supercapacitive properties of carbonaceous materials derived from waste biomass

| Materials              | BET surface area (m <sup>2</sup> g <sup>-1</sup> ) | Capacitance (F g <sup>-1</sup> ) | Current density (A g <sup>-1</sup> ) | Electrolyte                        | Reference no. |
|------------------------|----------------------------------------------------|----------------------------------|--------------------------------------|------------------------------------|---------------|
| Fermented rice         | 2106                                               | 250                              | 2                                    | 6 M KOH                            | [1]           |
| Waste tea-leaves       | 2841                                               | 270                              | 2                                    | 2 M KOH                            | [2]           |
| Human hair             | 1104                                               | 220                              | 2                                    | 6 M KOH                            | [3]           |
| Human hair             | 1306                                               | 280                              | 2                                    | 6 M KOH                            | [4]           |
| Carrageenan            | 2502                                               | 210                              | 2                                    | 6 M KOH                            | [5]           |
| Waste wood             | 3223                                               | 250                              | 2                                    | 1 M H <sub>2</sub> SO <sub>4</sub> | [6]           |
| Enteromorpha prolifera | 2405                                               | 260                              | 2                                    | 30 % KOH                           | [7]           |
| Chitosan               | 1579                                               | 280                              | 2                                    | 6 M KOH                            | [8]           |
| Willow catkins         | 1586                                               | 275                              | 2                                    | 6 M KOH                            | [9]           |
| Pomelo peel            | 2725                                               | 260                              | 2                                    | 6 M KOH                            | [10]          |
| Sewage Sludge          | 2839                                               | 340                              | 2                                    | 6 M KOH                            | This work     |

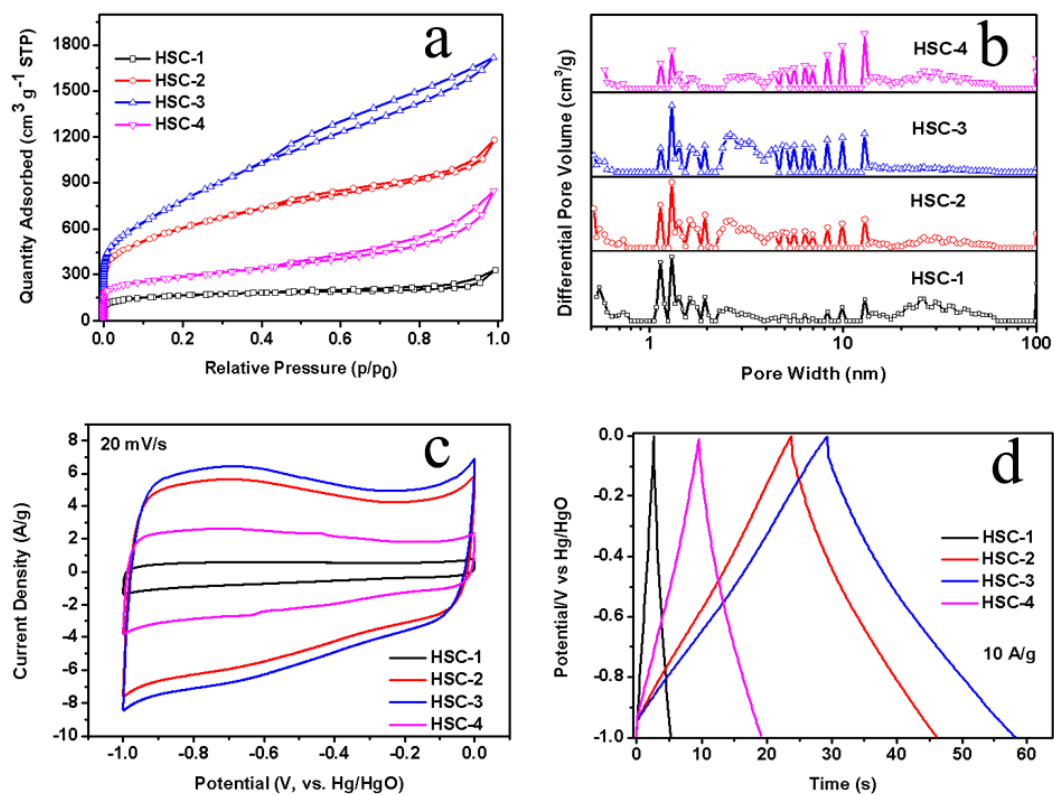

**Fig. S6** N<sub>2</sub> adsorption-desorption isothermal (a) and pore size distribution calculated from the adsorption branch of the isotherm by NLDFT method (b) of HSC-1, HSC-2, HSC-3 and HSC-4. CV measurements (c) and GCD curves (d) of HSC samples.

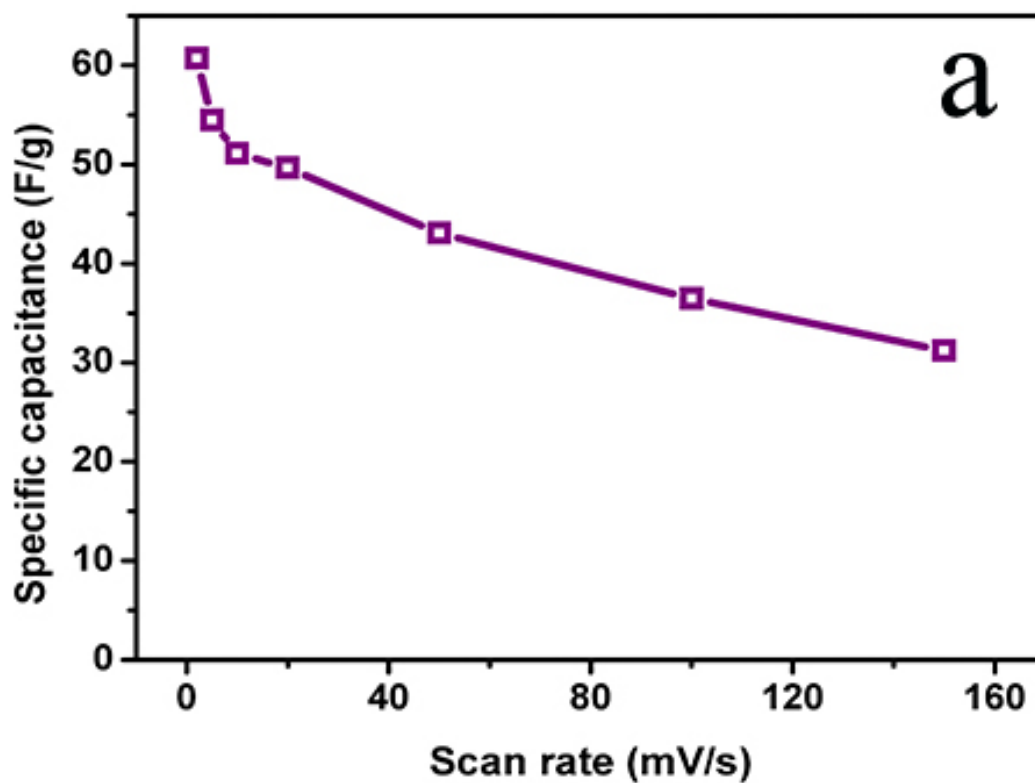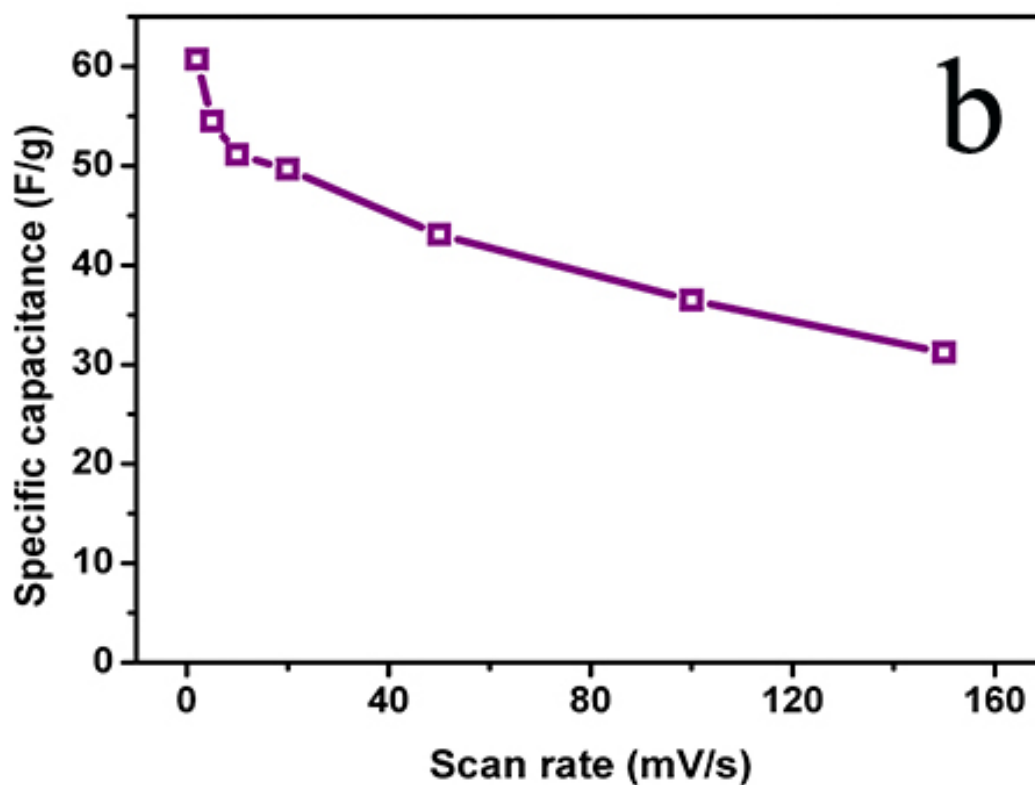

Fig. S7 Specific capacitance of HSC-3//HSC-3 symmetric supercapacitor calculated from cyclic curves (a) and galvanostatic charge/discharge curves (b).

## References

1. S. Gao, Y. Chen, H. Fan, X. Wei, C. Hu, H. Luo and L. Qu, *J. Mater. Chem. A*, 2014, **2**, 3317-3324.
2. C. Peng, X.-B. Yan, R.-T. Wang, J.-W. Lang, Y.-J. Ou and Q.-J. Xue, *Electrochimica Acta*, 2013, **87**, 401-408.
3. W. Si, J. Zhou, S. Zhang, S. Li, W. Xing and S. Zhuo, *Electrochimica Acta*, 2013, **107**, 397-405.
4. W. Qian, F. Sun, Y. Xu, L. Qiu, C. Liu, S. Wang and F. Yan, *Energ. Environ. Sci.*, 2014, **7**, 379-386.
5. Y. Fan, X. Yang, B. Zhu, P.-F. Liu and H.-T. Lu, *J. Power Sources*, 2014, **268**, 584-590.
6. Z. Jin, X. D. Yan, Y. H. Yu and G. J. Zhao, *J. Mater. Chem. A*, 2014, **2**, 11706-11715.
7. X. Gao, W. Xing, J. Zhou, G. Wang, S. Zhuo, Z. Liu, Q. Xue and Z. Yan, *Electrochim. Acta*, 2014, **133**, 459-466.
8. L. Sun, Y. Fu, C. G. Tian, Y. Yang, L. Wang, J. Yin, J. Ma, R. H. Wang and H. G. Fu, *ChemSusChem*, 2014, **7**, 1637-1646.
9. K. Wang, N. Zhao, S. Lei, R. Yan, X. Tian, J. Wang, Y. Song, D. Xu, Q. Guo and L. Liu, *Electrochim. Acta*, 2015, **166**, 1-11.
10. Q. Liang, L. Ye, Z.-H. Huang, Q. Xu, Y. Bai, F. Kang and Q.-H. Yang, *Nanoscale*, 2014, **6**, 13831-13837.
